# Supplementary material
Source: Springer Nature journal article supplement (https://www.springermedizin.de/resource/supplementary/12943_2010_710_MOESM1_ESM.pdf/9554630)

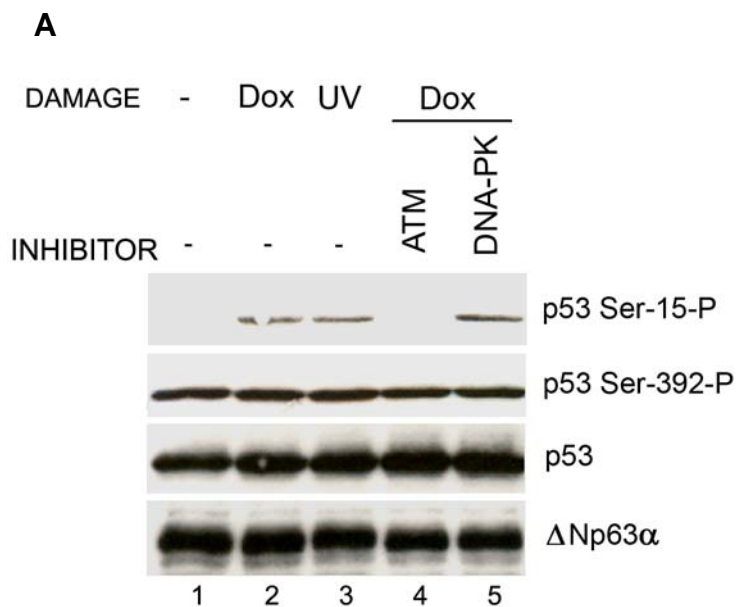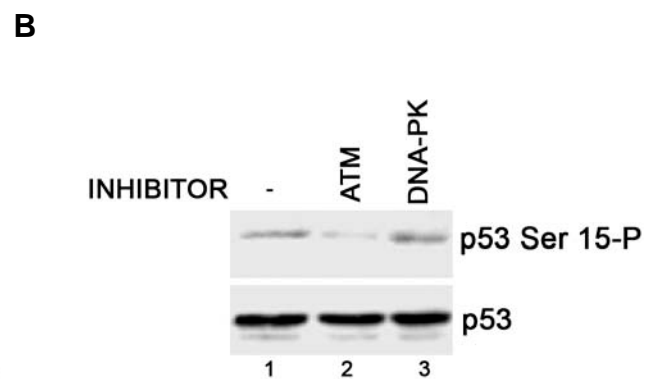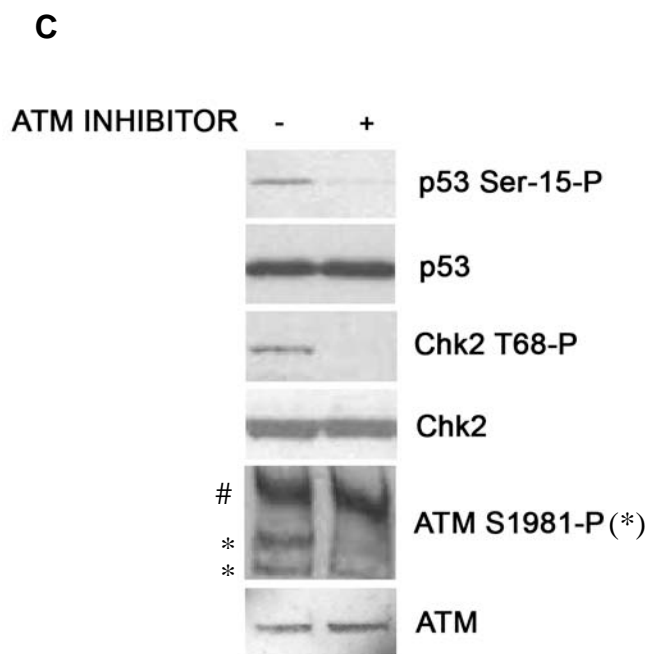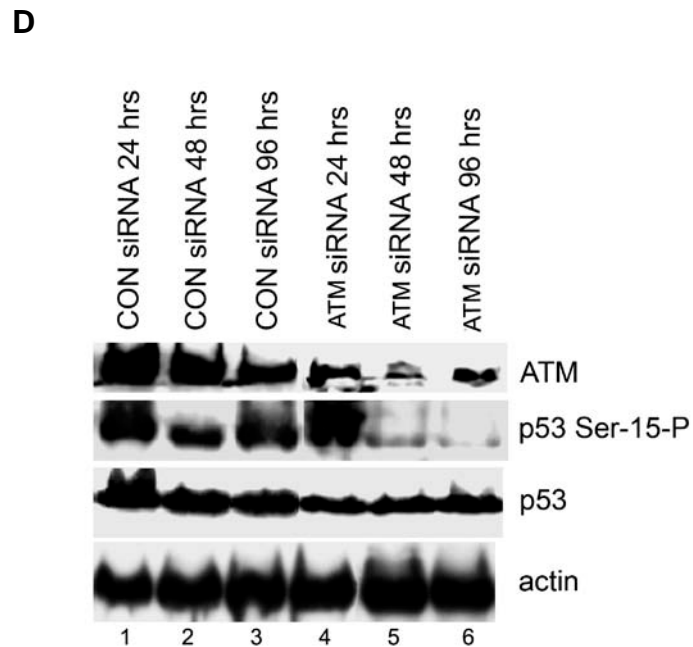

# - nonspecific band

\* - specific bands ATM S1981-P

Supplement: MOESM1 [file 9554630]
